# Supplementary material for: Exploring HONO production from particulate nitrate photolysis in representative regions of China: characteristics, influencing factors, and environmental implications
Source: Copernicus journal article supplement (doi:10.5194/acp-24-13183-2024), 2024-11-29
Supplement: Supplementary file 1 [file acp-24-13183-2024-supplement.pdf]

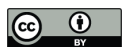

*Supplement of*

## **Exploring HONO production from particulate nitrate photolysis in representative regions of China: characteristics, influencing factors, and environmental implications**

**Bowen Li et al.**

*Correspondence to:* Kai Zhang ([zhangkai@craes.org.cn](mailto:zhangkai@craes.org.cn)) and Jiaqi Wang ([wang.jiaqi@craes.org.cn](mailto:wang.jiaqi@craes.org.cn))

The copyright of individual parts of the supplement might differ from the article licence.

## **S1 Methods**

### **S1.1 Sampling sites**

Beijing: samples were collected on the roof of a three-story building (10m above the ground level) in the campus of Chinese Research Academy of Environmental Science (CRAES) (116.40°E, 40.03°N) (Gao et al., 2016), which is located in the urban downtown area of northern Beijing, China, at a flow rate of 16.7 L min<sup>-1</sup> from December 28, 2022 to January 18, 2023, and from November 16 to 27, 2023. The sampling duration was 23 h (from 9:00 to 8:00 of the following day in local time, UTC+8).

Wangdu: the sampling site was on the platform (around 5m above ground) at the Station of Rural Environment, Research Center for Eco-Environmental Sciences (SRE-RCEES, 115.25°E, 38.67°N) (Li et al., 2020) situated in an open agricultural field of Wangdu county, Hebei Province of China. The station is 35 km southwest of Baoding city and 120 km away from Shijiazhuang city. Samples were collected at a flow rate of 16.7 L min<sup>-1</sup> from December 28, 2022 to January 18, 2023, and from November 20, 2023 to December 11, 2023.

Changji: samples were collected on the roof of a six-story building (18m above the ground level) at Fukang City ecological environment Bureau (87.98°E, 44.15°N) (Liu et al., 2024b) in Changji Autonomous Prefecture in Xinjiang, China, at a flow rate of 100 L min<sup>-1</sup> from November 3 to 19, 2019. The sampling duration was 23 h (from 9:00 to 8:00 of the following day in local time, UTC+8).

Xinxiang: the sampling site was located on the campus of Henan Normal University (113.91°E, 35.33°N, 25m above the ground level) (Liu et al., 2024a) in Xinxiang city, Henan Province of China. Samples were collected at a flow rate of 1050 L min<sup>-1</sup> from November 20, 2023 to December 10, 2023. The sampling duration was 23 h (from 9:00 to 8:00 of the following day in local time, UTC+8).

Guangzhou: samples were collected on the roof of a three-story building (10m above the ground level) at Guangdong Ecological Engineering Polytechnic College (113.38°E, 23.19°N) (Chen et al., 2021) in Guangzhou city, Guangdong Province of China, at a flow rate of 100 L min<sup>-1</sup> from November 20, 2023 to December 10, 2023. The sampling duration was 23 h (from 9:00 to 8:00 of the following day in local time, UTC+8).

### **S1.2 Extended Aerosol Inorganic Model (E-AIM model)**

E-AIM model (<http://www.aim.env.uea.ac.uk/aim>) is applied for calculating the partitioning of

gases, liquids, and solids in aerosol systems that include inorganic and organic components as well as water. This model has been widely utilized in numerous studies to explore aerosol formation, aging, and the impact of diverse atmospheric conditions on aerosol composition (Shi et al., 2021; Wexler and Clegg, 2002; Clegg et al., 1998). In this work, the Model IV, which is an equilibrium thermodynamic model of the system  $\text{H}^+ - \text{NH}_4^+ - \text{Na}^+ - \text{SO}_4^{2-} - \text{NO}_3^- - \text{Cl}^- - \text{H}_2\text{O}$ , was applied to calculate aerosol pH. Aerosol pH was calculated based on  $\text{H}_{\text{air}}^+$  and liquid water content (LWC) from E-AIM IV output:

$$\text{pH} = -\log_{10}\gamma_{\text{H}^+}\text{H}_{\text{aq}}^+ = -\log_{10}\gamma_{\text{H}^+}\frac{\text{H}_{\text{air}}^+}{\text{LWC}} \quad (1)$$

where,  $\gamma_{\text{H}^+}$  is the activity coefficient of  $\text{H}^+$  (dimensionless, assumed to be 1),  $\text{H}_{\text{aq}}^+$  ( $\text{mol kg}^{-1}$ ) is the concentration of  $\text{H}^+$  in aerosol liquid water,  $\text{H}_{\text{air}}^+$  ( $\text{mol m}^{-3}$ ) is the concentration of  $\text{H}^+$  per unit volume of air, LWC is the amount of liquid water in unit volume of air ( $\text{kg m}^{-3}$ ).

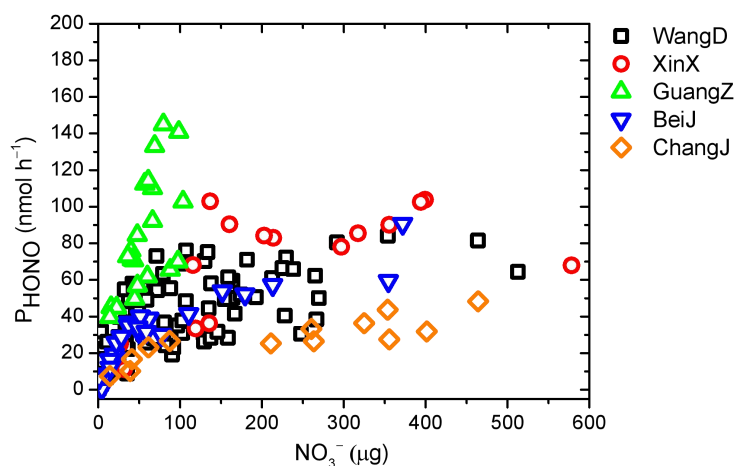

Figure S1 The relationships between  $\text{P}_{\text{HONO}}$  and particulate nitrate loadings in different sampling locations.

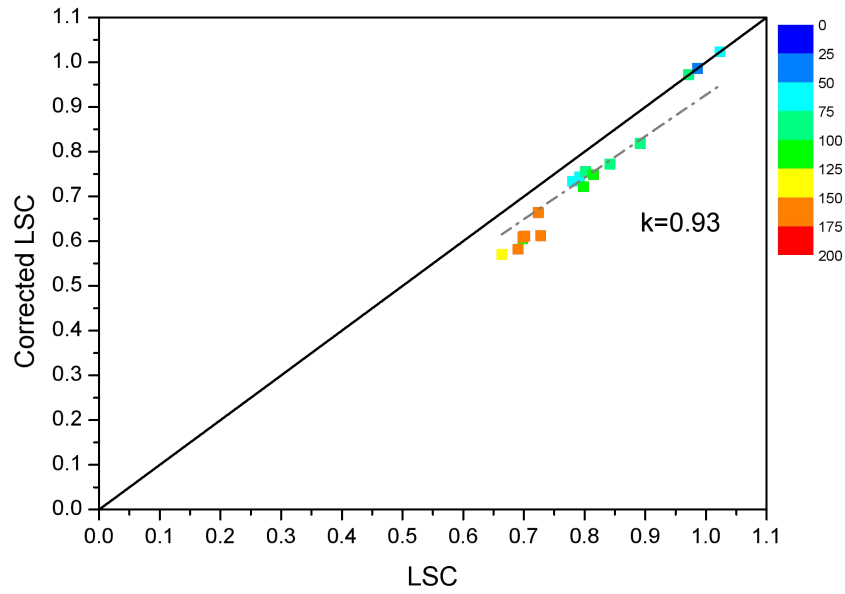

Figure S2 Scatter plot of the LSC and the corrected LSC for the aerosol samples collected in Wangdu. The dot colors represent the  $PM_{2.5}$  surface concentrations. The solid-black line represented the 1:1 ratio, and the gray-dashed line reflected the linear fitted relationship between LSC and the corrected one.

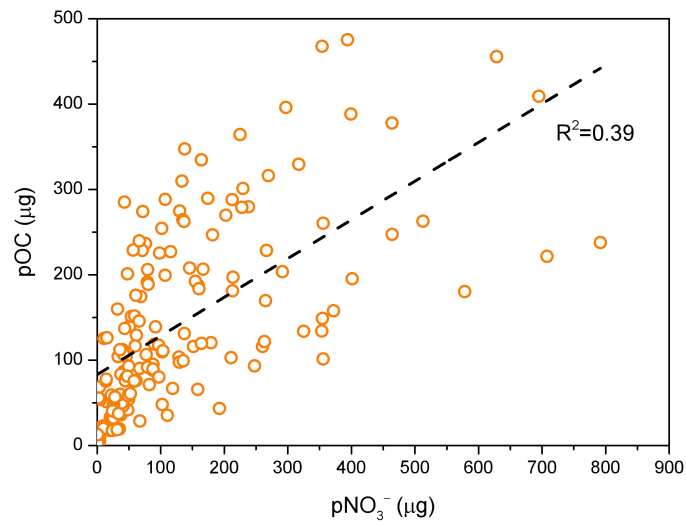

Figure S3 Relationship between  $pNO_3^-$  and  $pOC$ .

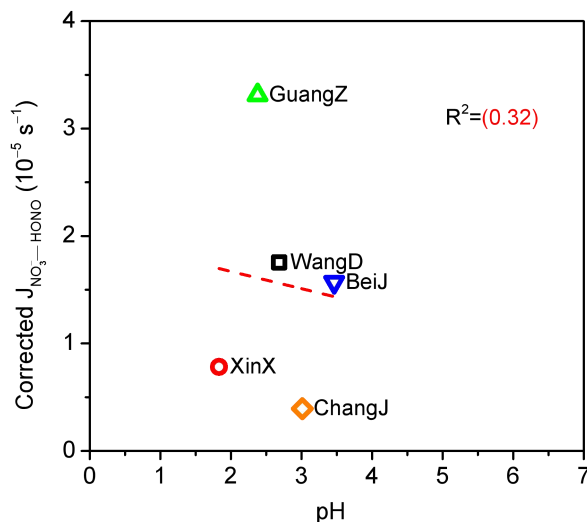

Figure S4. Relationships between the average corrected  $J_{\text{NO}_3\text{-HONO}}$  and pH under different sampling locations.

## References

- Chen, H., Yao, J., Huang, S., and Pang, H.: *Ophelimus bipolaris* sp. n. (Hymenoptera, Eulophidae), a New Invasive Eucalyptus Pest and Its Host Plants in China, 12, 778, <https://doi.org/10.3390/insects12090778>, 2021.
- Clegg, S. L., Brimblecombe, P., and Wexler, A. S.: Thermodynamic Model of the System  $\text{H}^+\text{-NH}_4^+\text{-Na}^+\text{-SO}_4^{2-}\text{-NO}_3^-\text{-Cl}^-\text{-H}_2\text{O}$  at 298.15 K, *J. Phy. Chem. A*, 102, 2155-2171, [10.1021/jp973043j](https://doi.org/10.1021/jp973043j), 1998.
- Gao, J., Peng, X., Chen, G., Xu, J., Shi, G., Zhang, Y., and Feng, Y.: Insights into the chemical characterization and sources of  $\text{PM}_{2.5}$  in Beijing at a 1-h time resolution, *Sci. Total Environ.*, 542, 162-171, <https://doi.org/10.1016/j.scitotenv.2015.10.082>, 2016.
- Li, X., Zhang, C., Liu, P., Liu, J., Zhang, Y., Liu, C., and Mu, Y.: Significant influence of the intensive agricultural activities on atmospheric  $\text{PM}_{2.5}$  during autumn harvest seasons in a rural area of the North China Plain, *Atmos. Environ.*, 241, 117844, <https://doi.org/10.1016/j.atmosenv.2020.117844>, 2020.
- Liu, H., Xu, M., Yang, Y., Cheng, K., Liu, Y., Fan, Y., Yao, D., Tian, D., Li, L., Zhao, X., Zhang, R., and Xu, Y.: The oxidative potential of fine ambient particulate matter in Xinxiang, North China: Pollution characteristics, source identification and regional transport, *Environ. Pollut.*, 360, 124615,

<https://doi.org/10.1016/j.envpol.2024.124615>, 2024a.

Liu, J., Ma, T., Chen, J., Peng, X., Zhang, Y., Wang, Y., Peng, J., Shi, G., Wei, Y., and Gao, J.: Insights into PM<sub>2.5</sub> pollution of four small and medium-sized cities in Chinese representative regions: Chemical compositions, sources and health risks, *Sci. Total Environ.*, 918, 170620, <https://doi.org/10.1016/j.scitotenv.2024.170620>, 2024b.

Shi, Q., Tao, Y., Krechmer, J. E., Heald, C. L., Murphy, J. G., Kroll, J. H., and Ye, Q.: Laboratory investigation of renoxification from the photolysis of inorganic particulate nitrate, *Environ. Sci. Technol.*, 55, 854-861, [10.1021/acs.est.0c06049](https://doi.org/10.1021/acs.est.0c06049), 2021.

Wexler, A. S. and Clegg, S. L.: Atmospheric aerosol models for systems including the ions H<sup>+</sup>, NH<sub>4</sub><sup>+</sup>, Na<sup>+</sup>, SO<sub>4</sub><sup>2-</sup>, NO<sub>3</sub><sup>-</sup>, Cl<sup>-</sup>, Br<sup>-</sup>, and H<sub>2</sub>O, *J. Geophys. Res. Atmos.*, 107, ACH 14-1-ACH 14-14, <https://doi.org/10.1029/2001JD000451>, 2002.
